# Supplementary material
Source: publisher figshare collection journal article supplement (https://diabetesjournals.figshare.com/articles/dataset/_/14538108)

**A** Gating strategy

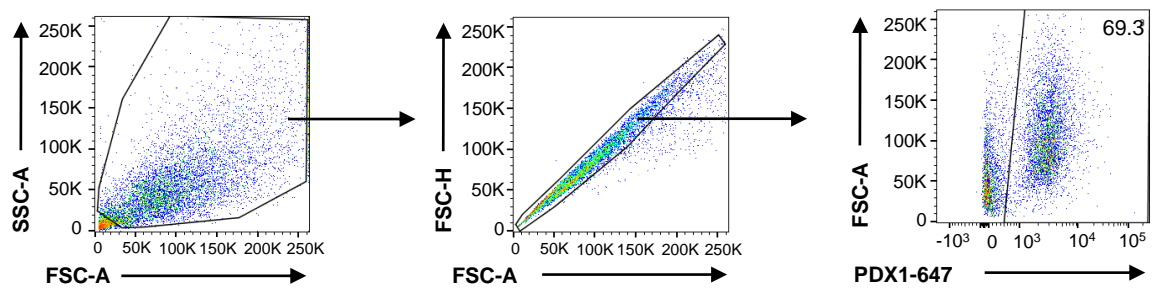

**B**

D20 endocrine progenitors

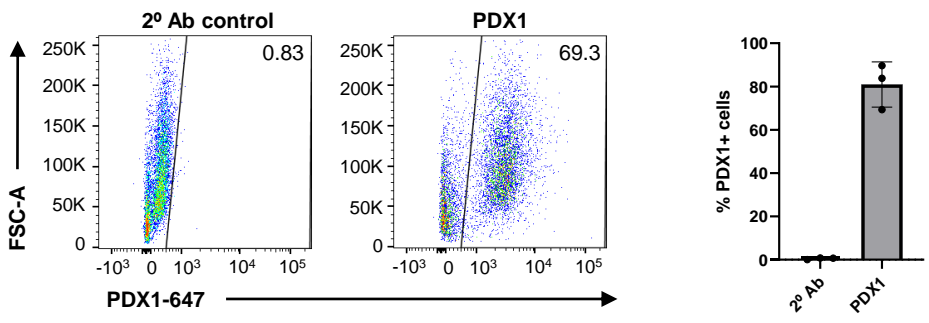

**C**

D35  $\beta$ -like cells

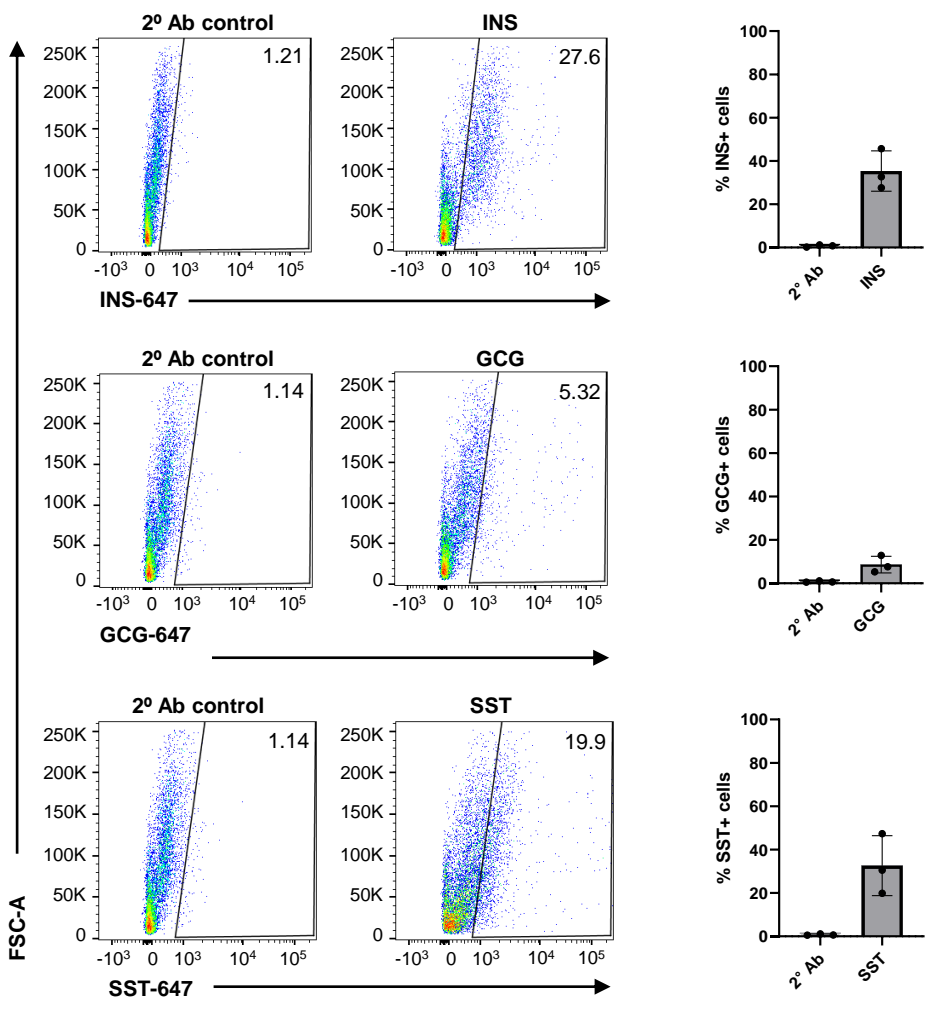

**A**

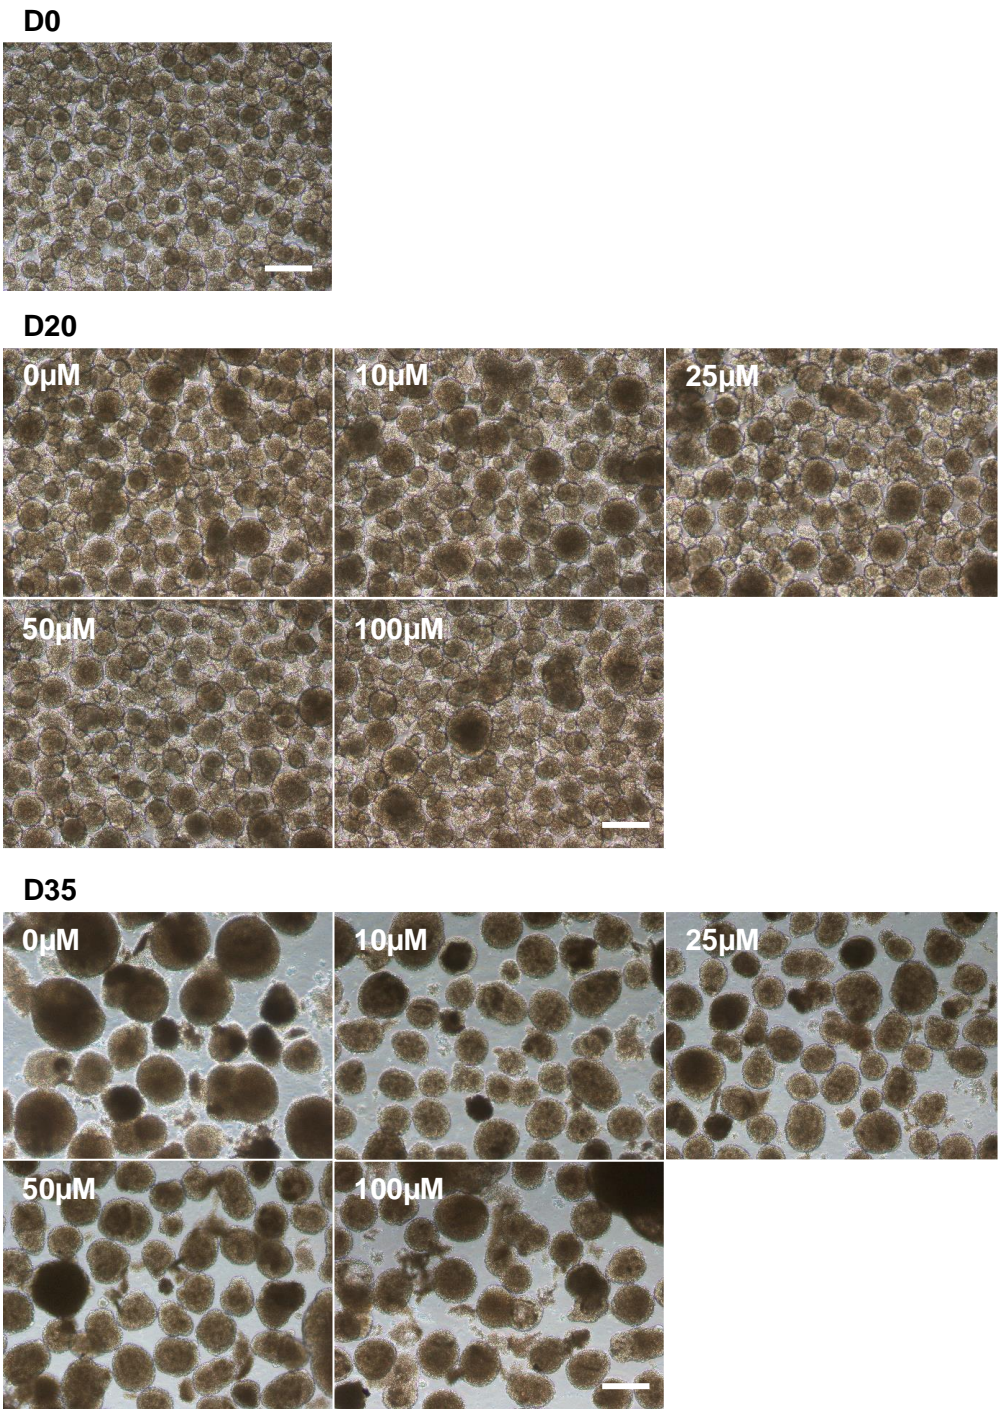

**B**

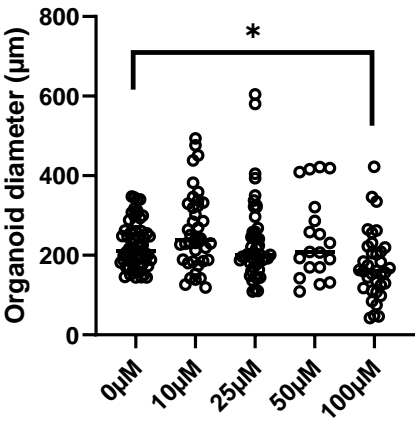

A

Treatment from pancreatic progenitor stage

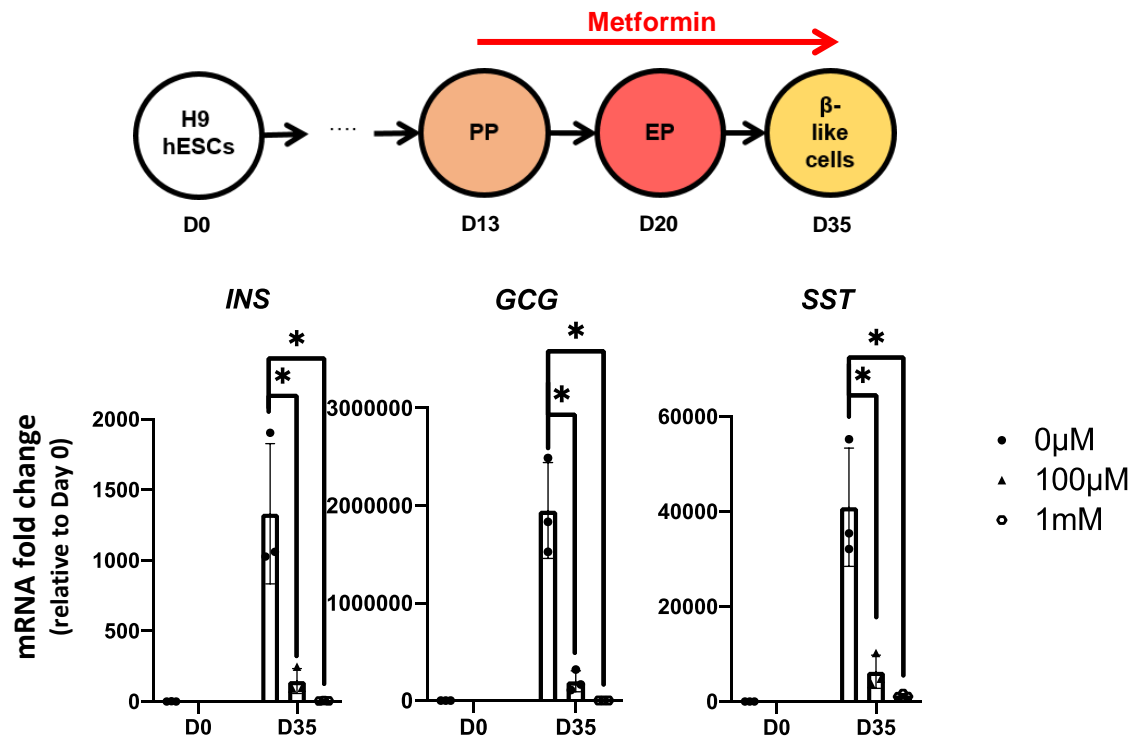

B

Treatment from endocrine progenitor stage

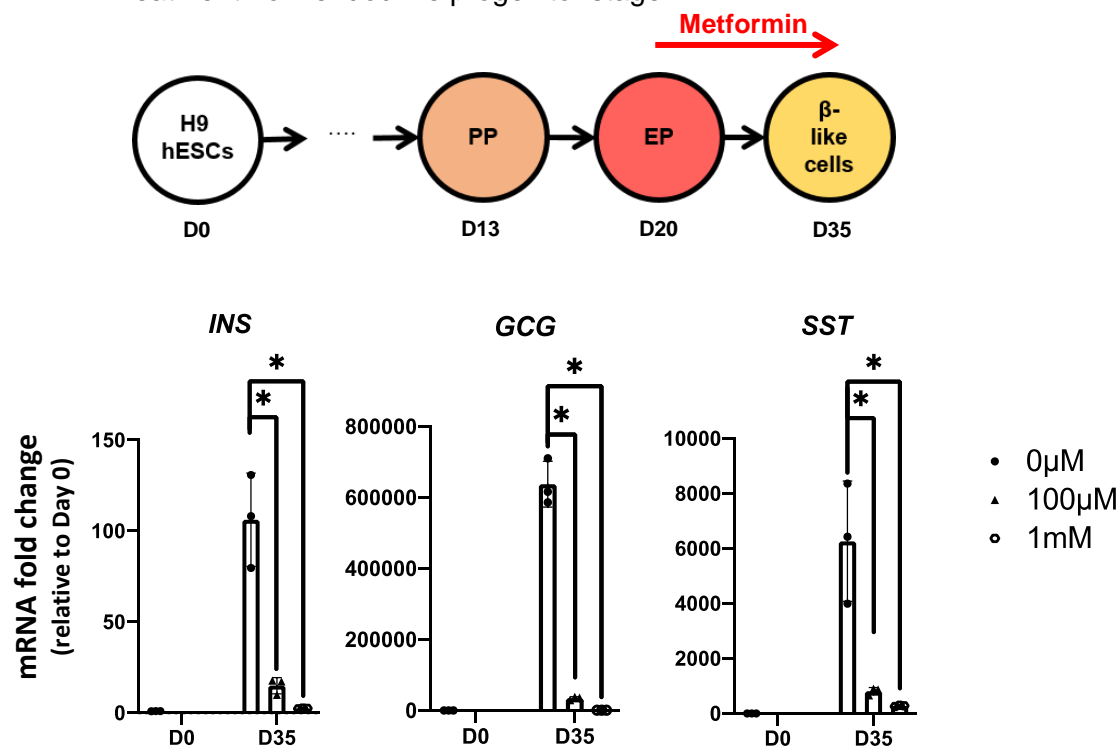

A D35  $\beta$ -like cells

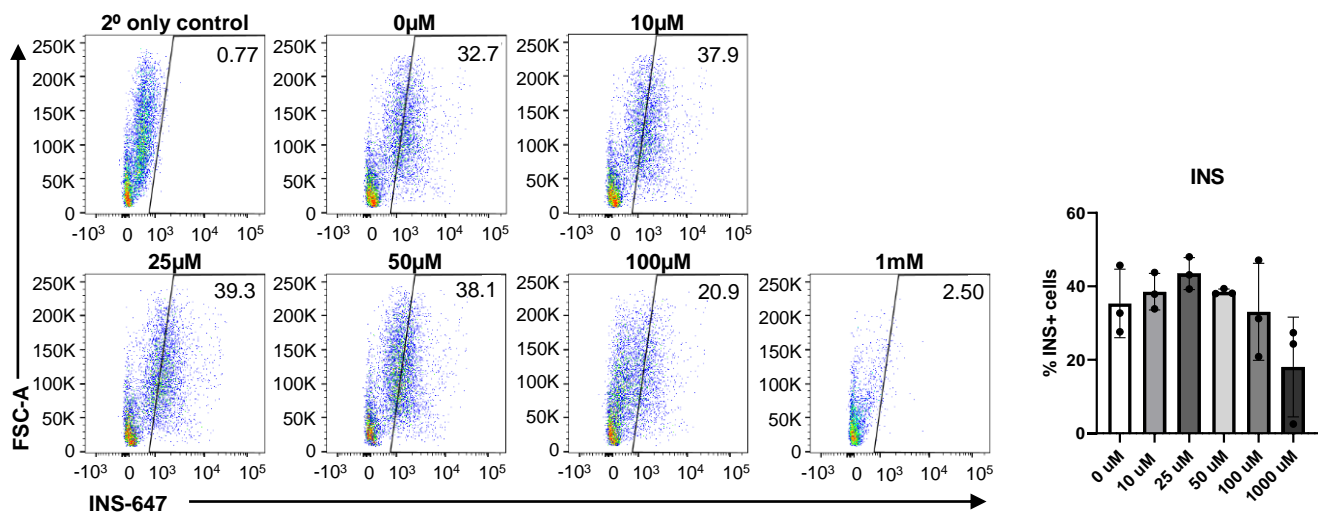

B

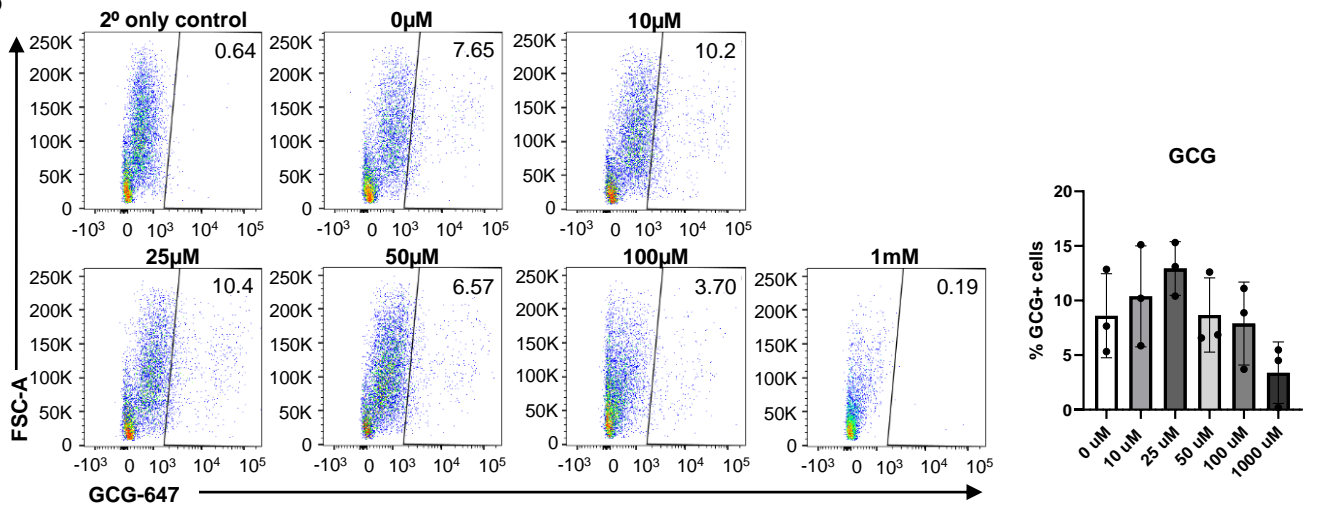

C

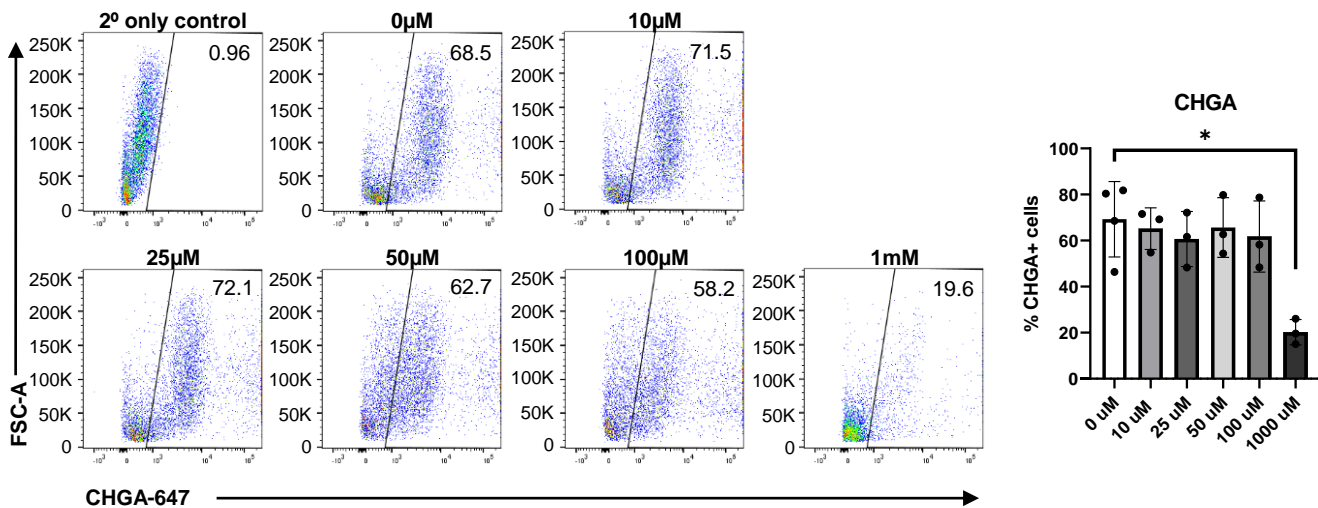



D35  $\beta$ -like cell clumps

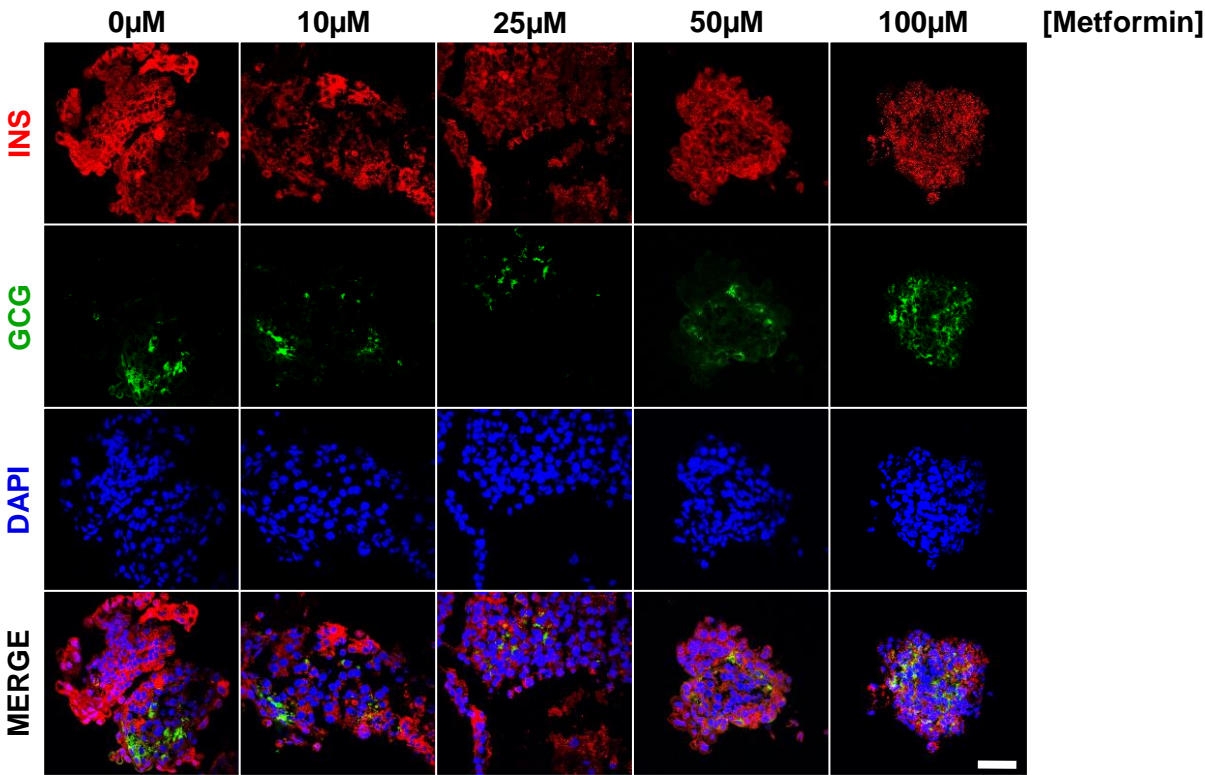

D35  $\beta$ -like cell clumps

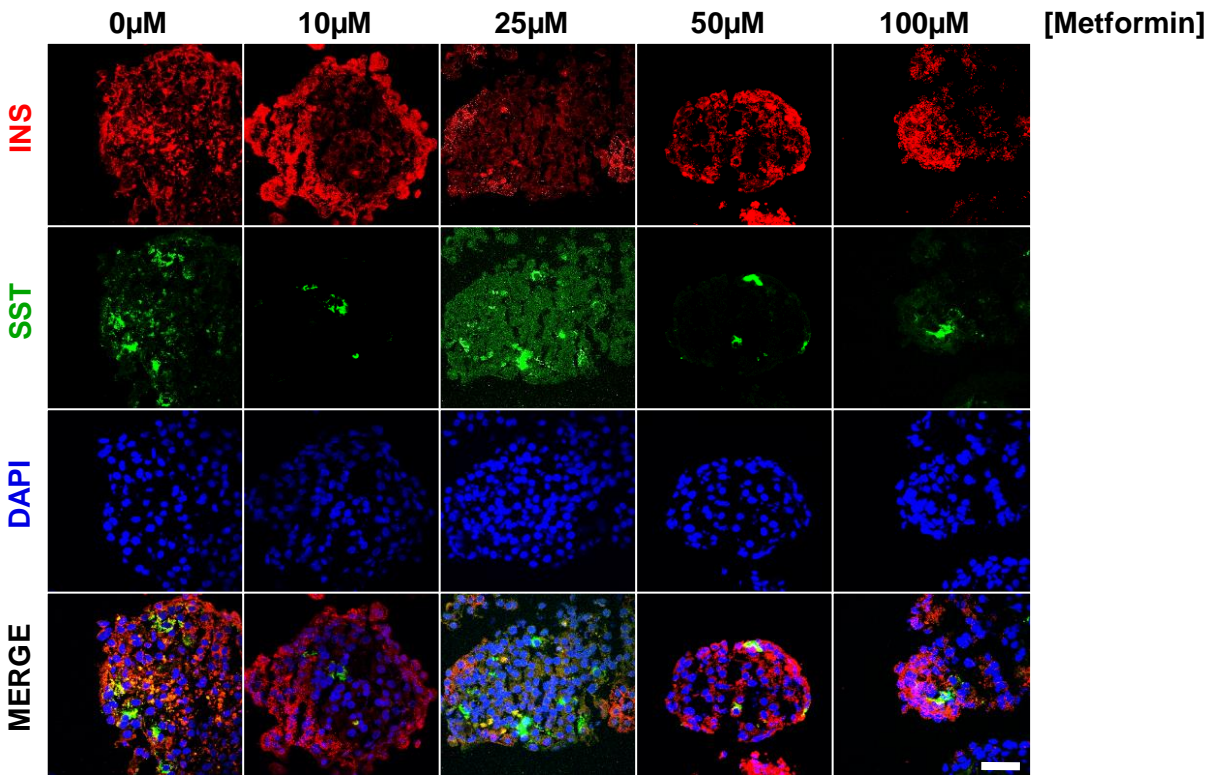

Transcript levels in D35  $\beta$ -like clumps

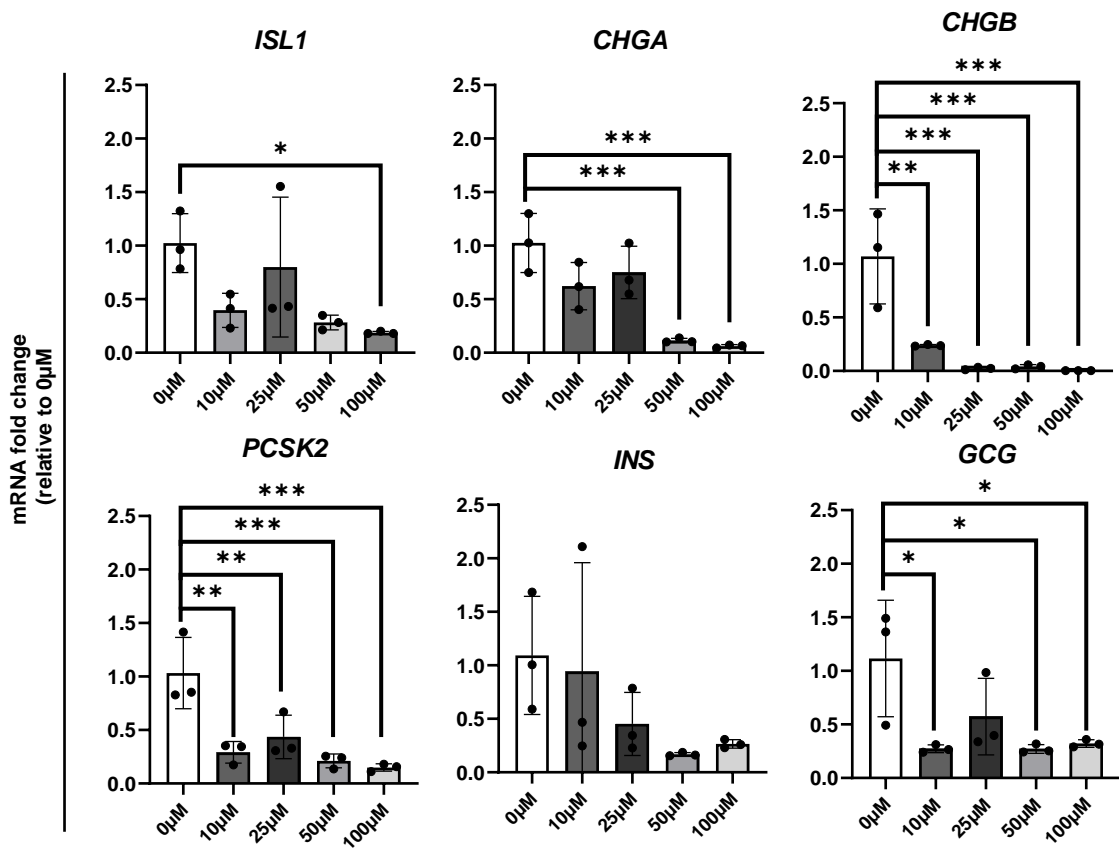

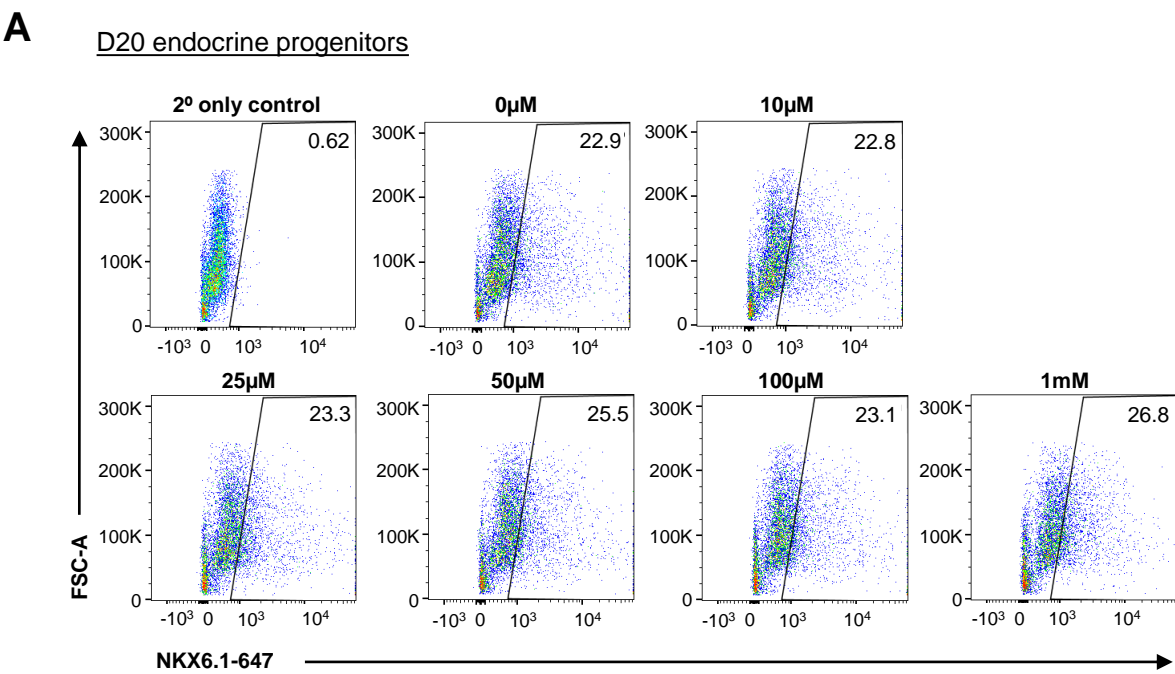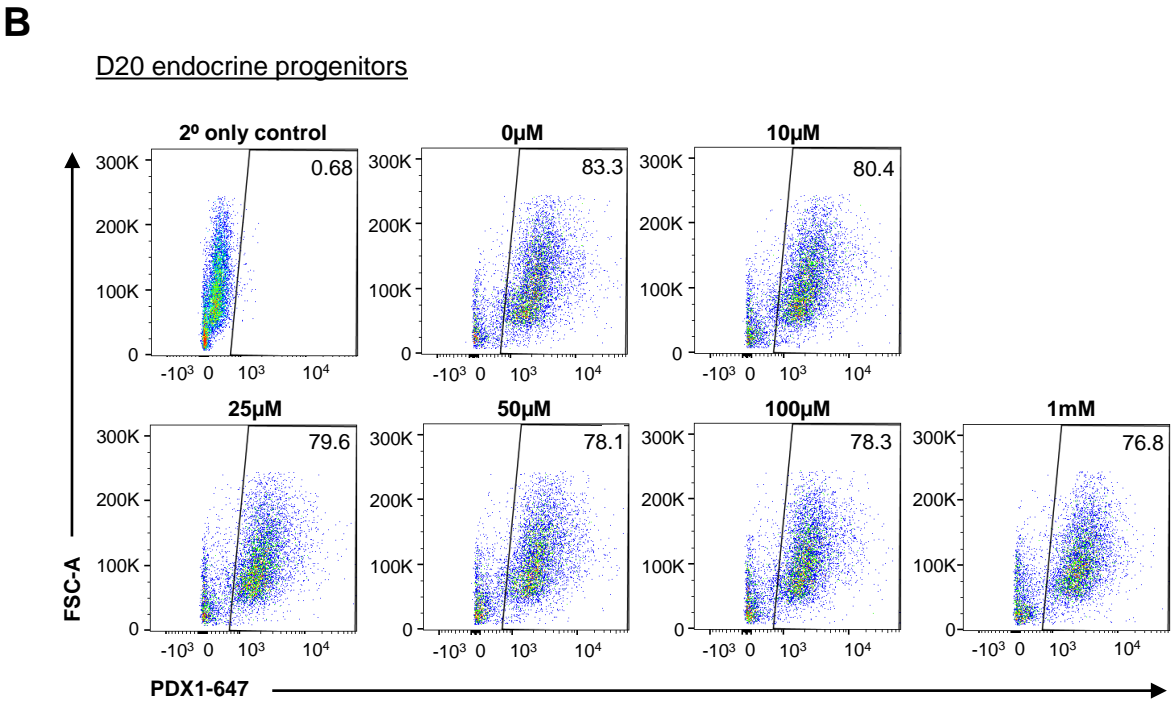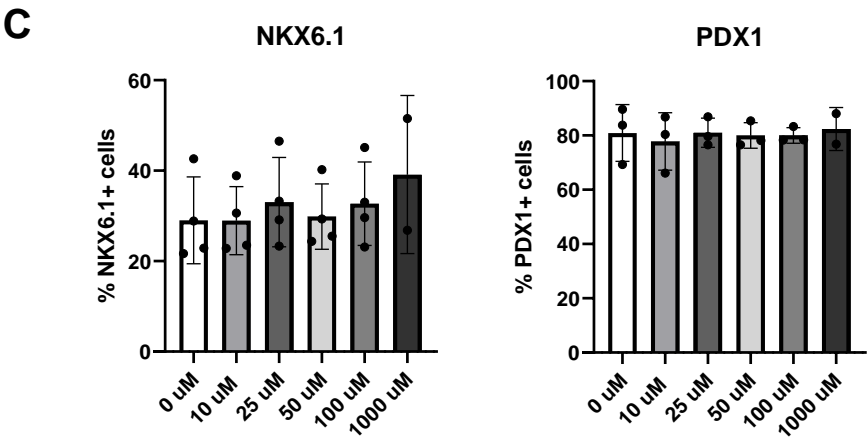

A

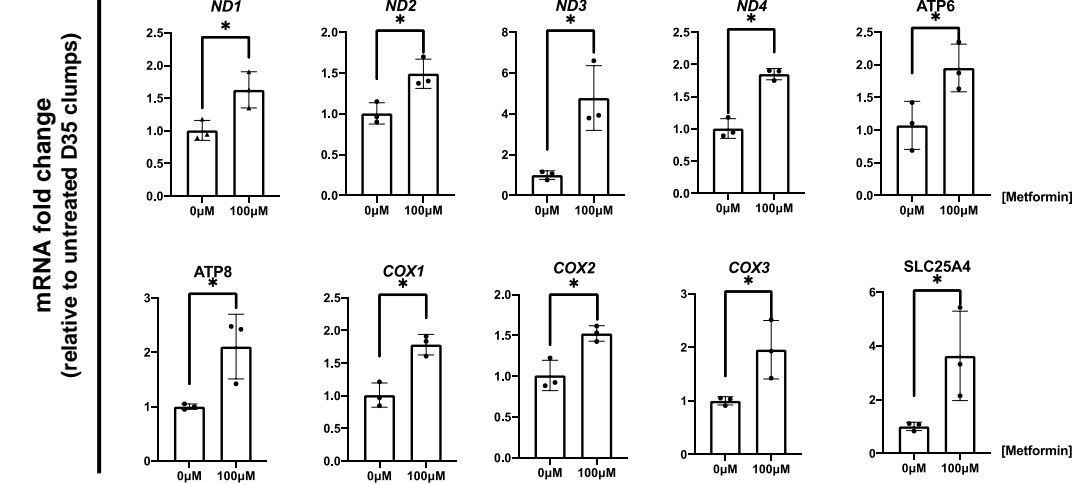

B

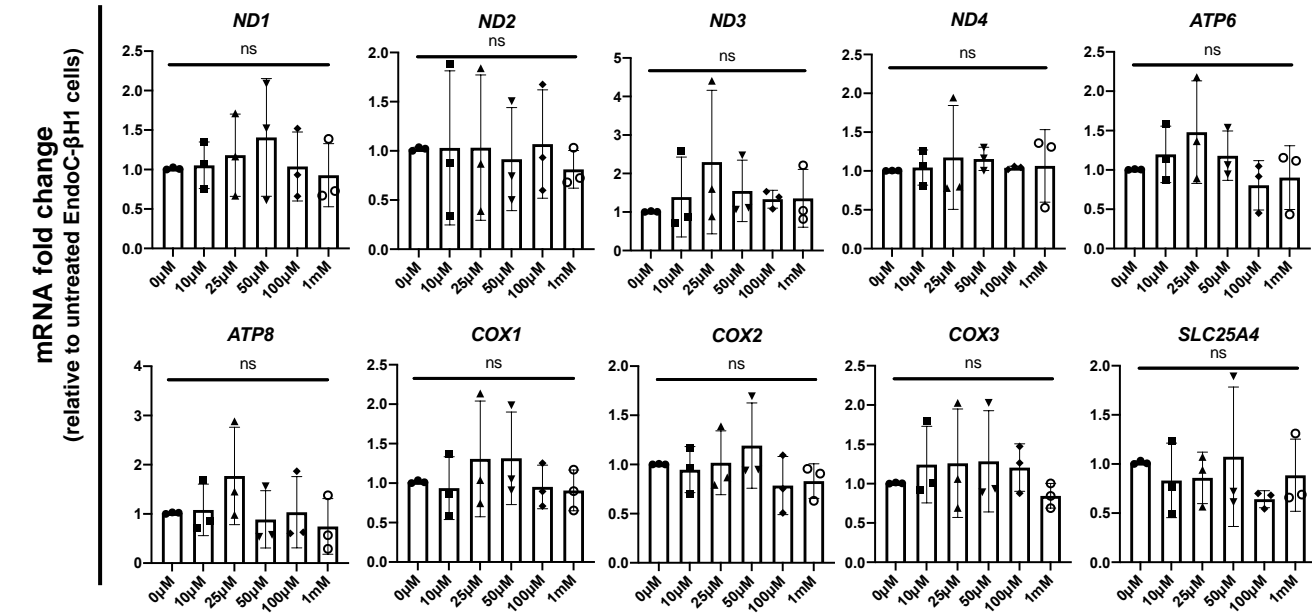

C

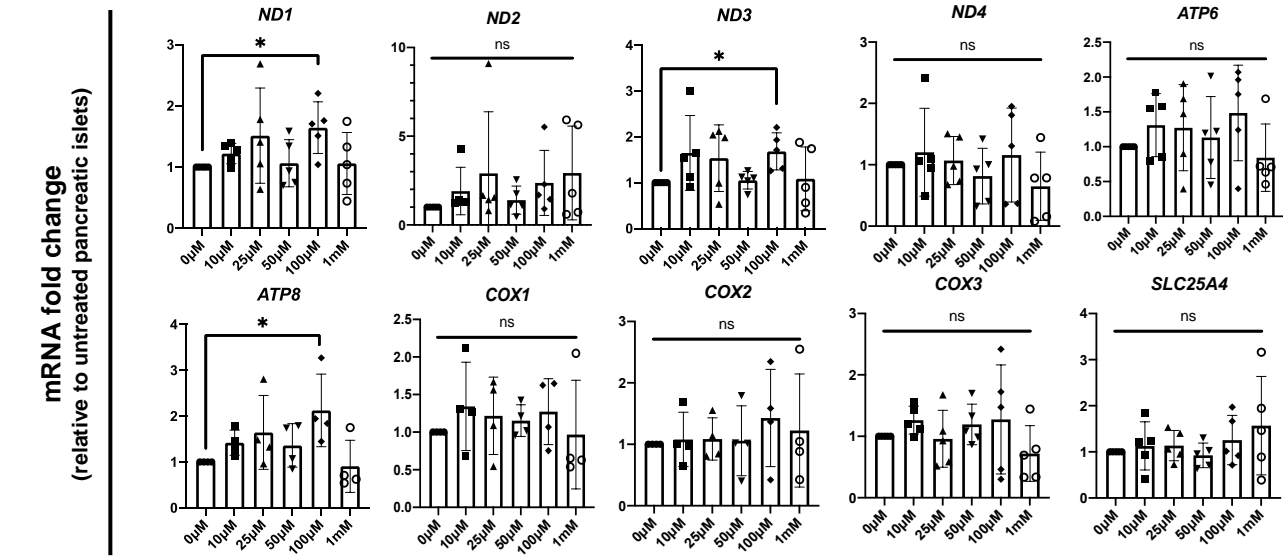



A

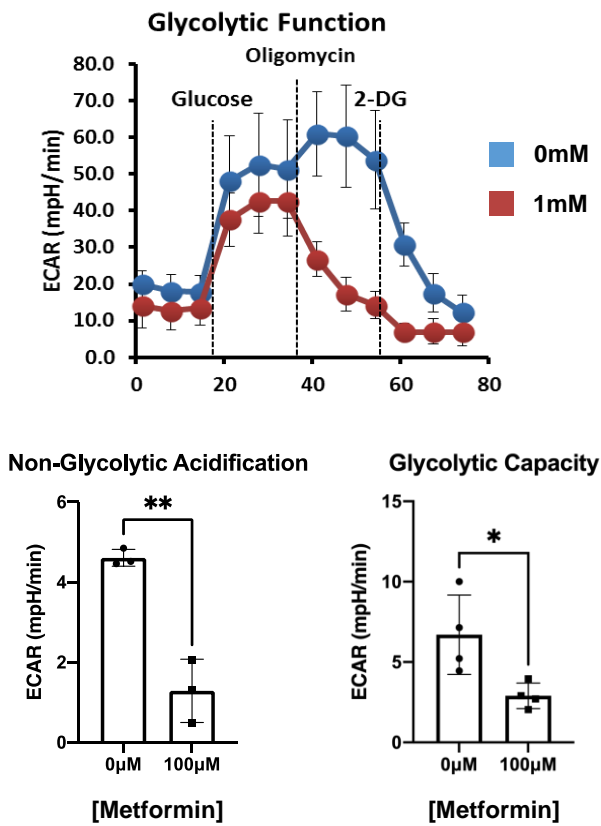

B

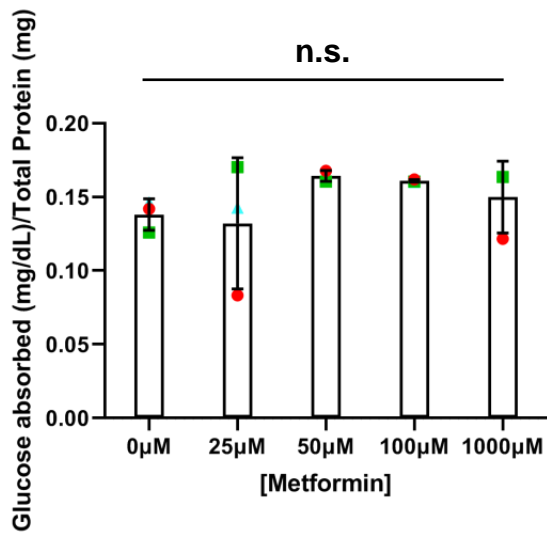

A

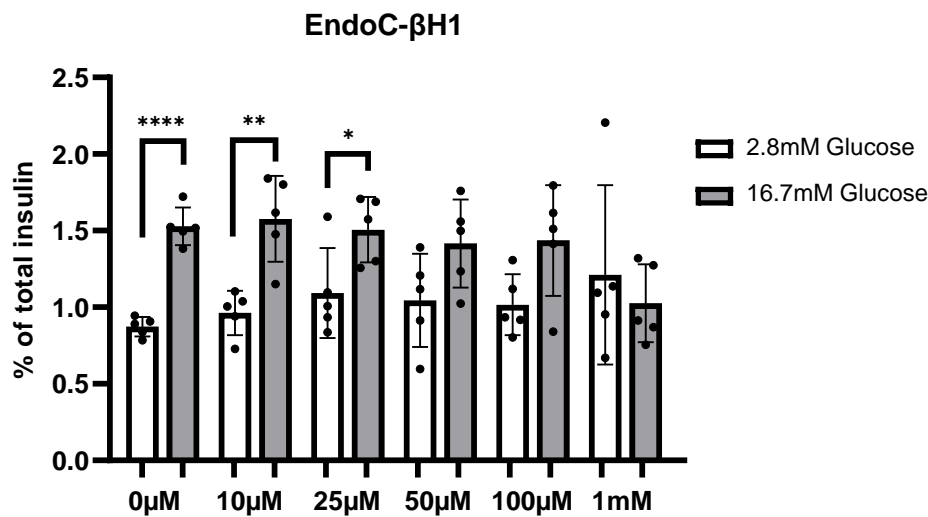

B

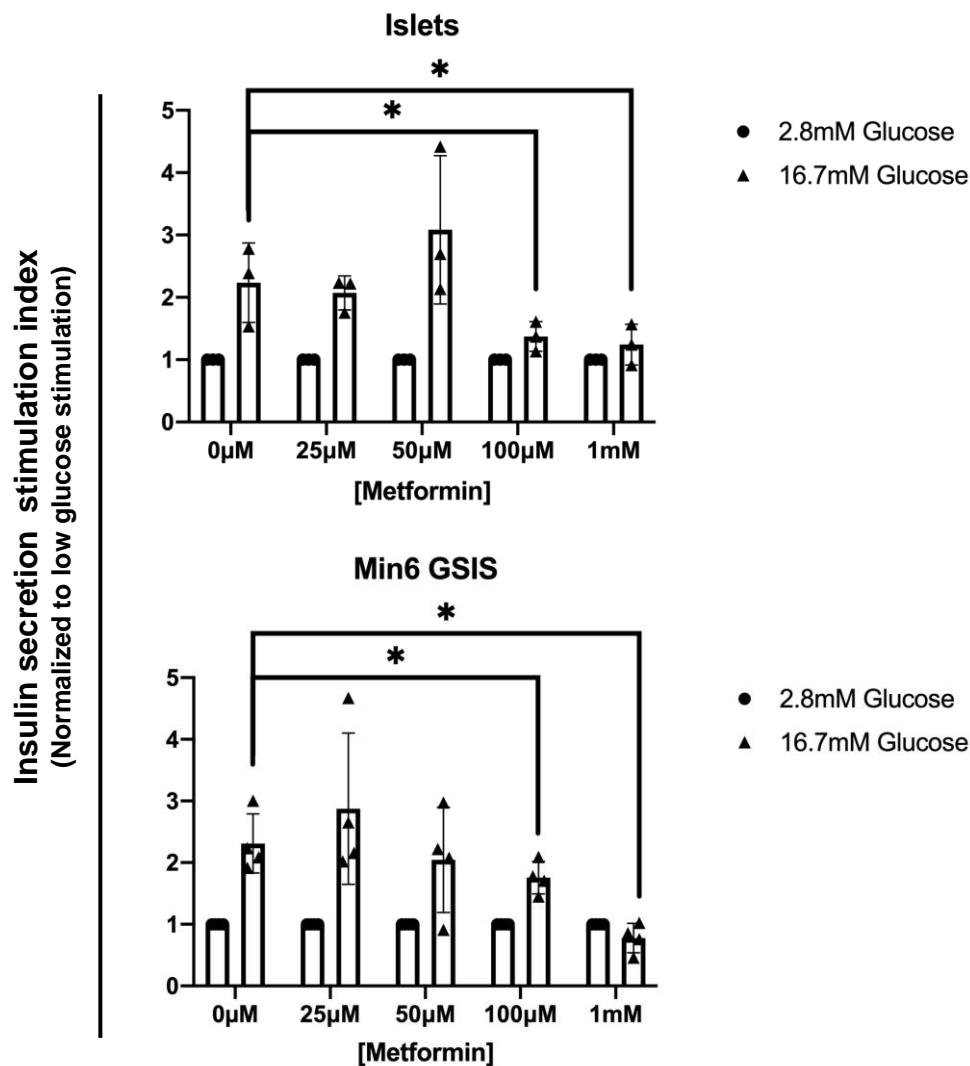

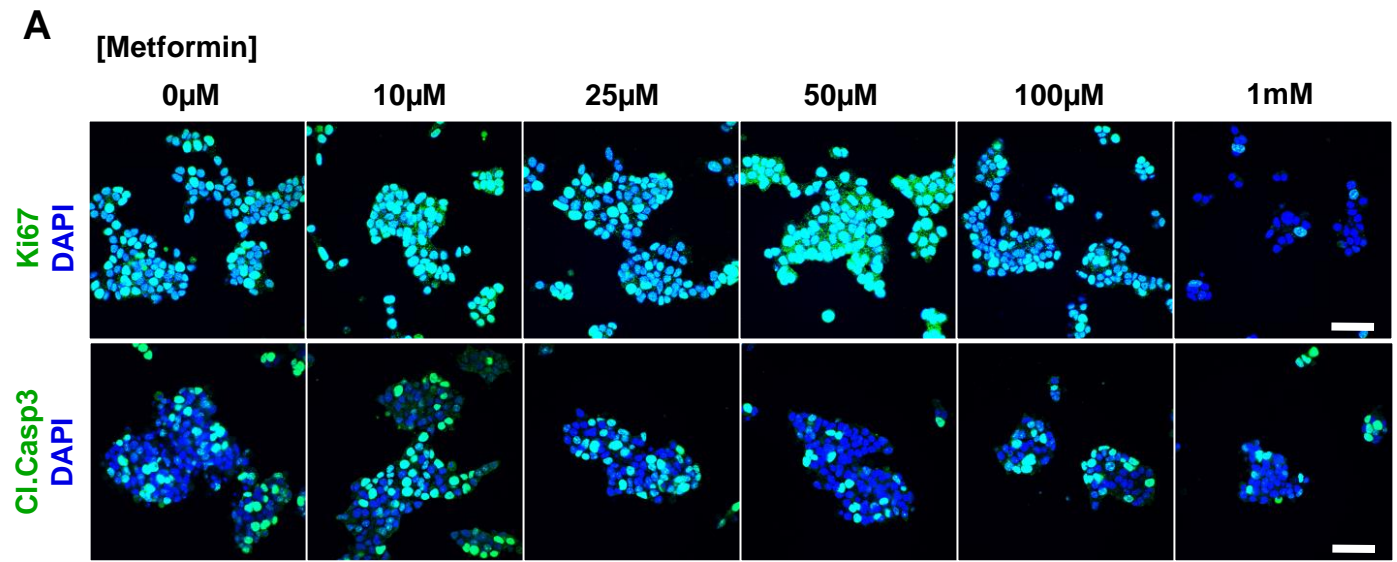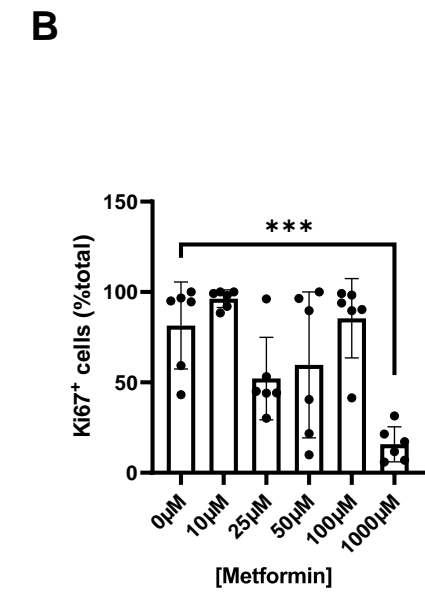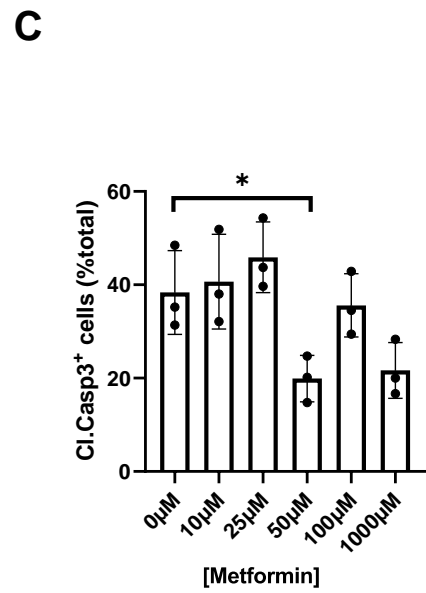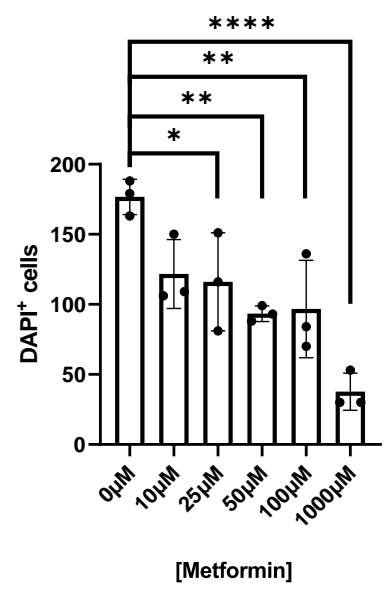

Supplement: Supplementary file 1 [file 1]
