# Supplementary material
Source: publisher figshare collection journal article supplement (https://diabetesjournals.figshare.com/articles/dataset/_/14538108)
Supplement: Supplementary file 2 [file 1]

## Checklist for Reporting Human Islet Preparations Used in Research

Adapted from Hart NJ, Powers AC (2018) Progress, challenges, and suggestions for using human islets to understand islet biology and human diabetes. Diabetologia <https://doi.org/10.1007/s00125-018-4772-2>.

|                                                                                                                                      |                                                                                            |
|--------------------------------------------------------------------------------------------------------------------------------------|--------------------------------------------------------------------------------------------|
| <b>Manuscript DOI:</b>                                                                                                               |                                                                                            |
| <b>Title:</b> Metformin perturbs pancreatic differentiation from human embryonic stem cells                                          |                                                                                            |
| <b>Author list:</b> Linh Nguyen, Nur Shabrina Amirruddin, Shirley Suet Lee Ding, Shawn Hoon, Shiao-Yng Chan and Adrian Kee Keong Teo |                                                                                            |
| <b>Corresponding author:</b> Adrian Kee Keong Teo                                                                                    | <b>Email address:</b> <a href="mailto:ateo@imcb.a-star.edu.sg">ateo@imcb.a-star.edu.sg</a> |

| Islet preparation              | 1     | 2     | 3     | 4 | 5 | 6 | 7 | 8 <sup>a</sup> |
|--------------------------------|-------|-------|-------|---|---|---|---|----------------|
| MANDATORY INFORMATION          |       |       |       |   |   |   |   |                |
| Unique identifier              | H2130 | H2129 | H2207 |   |   |   |   |                |
| Donor age (years)              | 45    | 74    | 58    |   |   |   |   |                |
| Donor sex (M/F)                | M     | M     | F     |   |   |   |   |                |
| Donor BMI (kg/m <sup>2</sup> ) | 25    | 26.8  | 23    |   |   |   |   |                |

|                                                                             |                                                           |                                                           |                                                           |  |  |  |  |  |
|-----------------------------------------------------------------------------|-----------------------------------------------------------|-----------------------------------------------------------|-----------------------------------------------------------|--|--|--|--|--|
| Donor HbA <sub>1c</sub> or other measure of blood glucose control           | N/A                                                       | N/A                                                       | N/A                                                       |  |  |  |  |  |
| Origin/source of islets <sup>b</sup>                                        | Clinical Islet Laboratory, University of Alberta Hospital | Clinical Islet Laboratory, University of Alberta Hospital | Clinical Islet Laboratory, University of Alberta Hospital |  |  |  |  |  |
| Islet isolation centre                                                      | Clinical Islet Laboratory, University of Alberta Hospital | Clinical Islet Laboratory, University of Alberta Hospital | Clinical Islet Laboratory, University of Alberta Hospital |  |  |  |  |  |
| Donor history of diabetes? Yes/No                                           | No                                                        | No                                                        | No                                                        |  |  |  |  |  |
| <b>If Yes, complete the next two lines if this information is available</b> |                                                           |                                                           |                                                           |  |  |  |  |  |
| Diabetes duration (years)                                                   |                                                           |                                                           |                                                           |  |  |  |  |  |
| Glucose-lowering therapy at time of death <sup>c</sup>                      |                                                           |                                                           |                                                           |  |  |  |  |  |

| RECOMMENDED INFORMATION |  |  |  |  |  |  |  |  |
|-------------------------|--|--|--|--|--|--|--|--|
| Donor cause of death    |  |  |  |  |  |  |  |  |
| Warm ischaemia time (h) |  |  |  |  |  |  |  |  |

|                                                                                   |                                      |                                      |                                      |  |  |  |  |  |
|-----------------------------------------------------------------------------------|--------------------------------------|--------------------------------------|--------------------------------------|--|--|--|--|--|
| Cold ischaemia time (h)                                                           |                                      |                                      |                                      |  |  |  |  |  |
| Estimated purity (%)                                                              |                                      |                                      |                                      |  |  |  |  |  |
| Estimated viability (%)                                                           |                                      |                                      |                                      |  |  |  |  |  |
| Total culture time (h) <sup>d</sup>                                               | 48                                   | 48                                   | 48                                   |  |  |  |  |  |
| Glucose-stimulated insulin secretion or other functional measurement <sup>e</sup> | Glucose-stimulated insulin secretion | Glucose-stimulated insulin secretion | Glucose-stimulated insulin secretion |  |  |  |  |  |
| Handpicked to purity? Yes/No                                                      | Yes                                  | Yes                                  | Yes                                  |  |  |  |  |  |
| Additional notes                                                                  |                                      |                                      |                                      |  |  |  |  |  |

<sup>a</sup>If you have used more than eight islet preparations, please complete additional forms as necessary

<sup>b</sup>For example, IIDP, ECIT, Alberta IsletCore

<sup>c</sup>Please specify the therapy/therapies

<sup>d</sup>Time of islet culture at the isolation centre, during shipment and at the receiving laboratory

<sup>e</sup>Please specify the test and the results
